# Supplementary material for: Altered expression of fibroblast activation protein-α (FAP) in colorectal adenoma-carcinoma sequence and in lymph node and liver metastases
Source: Aging (Albany NY). 2020 May 19;12(11):10337–58. doi: 10.18632/aging.103261 (PMC7346028; doi:10.18632/aging.103261)
Supplement: Supplementary Figures [file aging-12-103261-s002..pdf]

SUPPLEMENTARY FIGURES

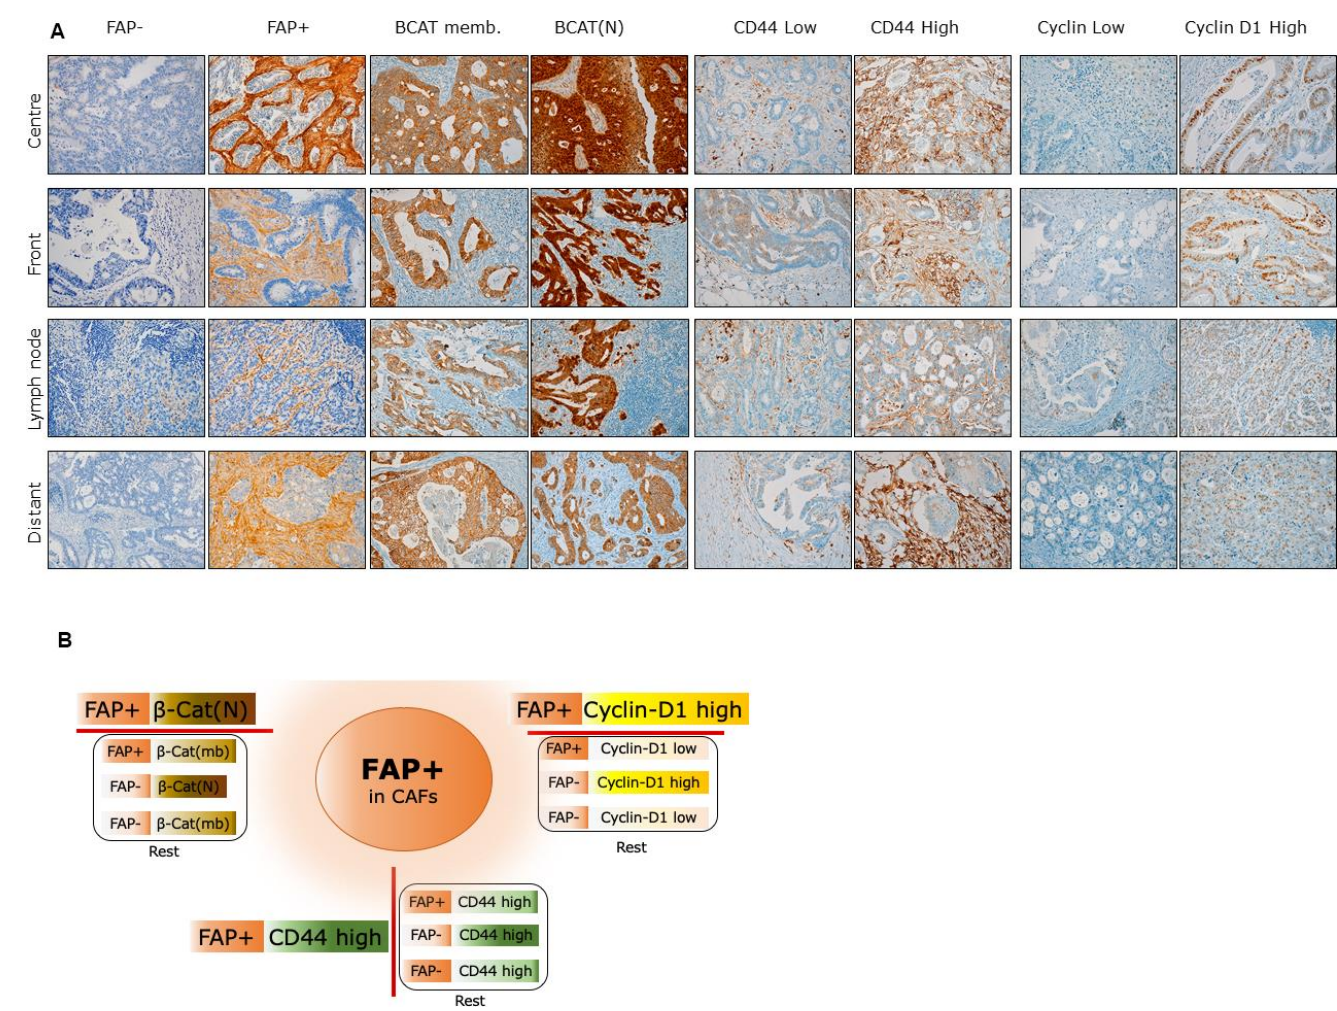

**Supplementary Figure 1.** (A) Images of immunohistochemical stains of FAP, BCAT, CD44 and Cyclin-D1. It is illustrated the entire spectrum of immunohistochemical results obtained in the different anatomical locations studied throughout the evolution AdC (primary tumour centre, infiltrative front, lymph node metastasis and distant liver metastasis). (B) Different combinations of TME immunohistochemical markers. The relationship between FAP+ / nuclear BCAT, FAP+ / CD44 high and FAP+ / Cyclin D1 high regarding to the rest of combinations in each pair of markers was studied. Data from tumour centre, infiltrating front and lymph node metastases were combined.

## Classification and Regression Tree (CRT) for soluble FAP and CRC patients' survival

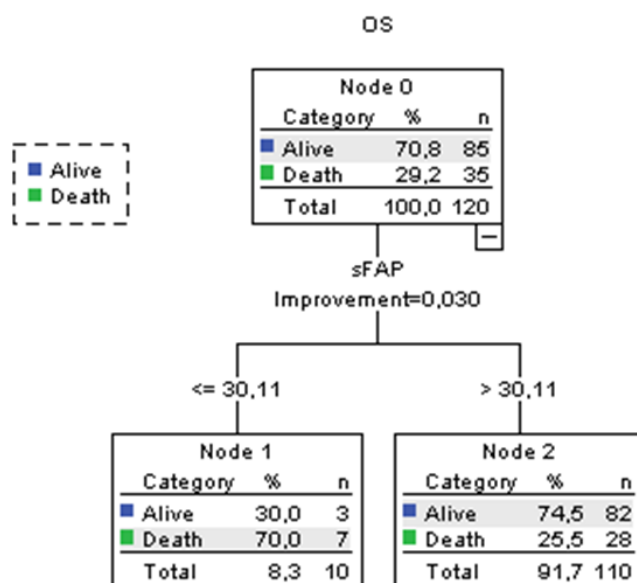

**Supplementary Figure 2. Classification and Regression Tree (CRT).** A sFAP value of 30,11 ng/mL determined two nodes with significant differences in the percentage of alive patients ( $p=0.03$ ).
